# Supplementary material for: Transposable Elements Contribute to Activation of Maize Genes in Response to Abiotic Stress
Source: PLoS Genet. 2015 Jan 8;11(1):e1004915. doi: 10.1371/journal.pgen.1004915 (PMC4287451; doi:10.1371/journal.pgen.1004915)
Supplement: S1 Table — Sequencing depth for the samples used in this study. (XLSX) [file pgen.1004915.s006.xlsx]

## Sheet: Table S1
Table S1. Sequencing depth for the samples used in this study.
Genotype	Condition	Replicate	Number of reads	Accession Number
B73	control	rep 1	27497178	SRS592187
B73	control	rep 2	32590508	SRS592188
B73	control	rep 3	44422177	SRS592189
Mo17	control	rep 1	24577635	SRS592176
Mo17	control	rep 2	34724466	SRS592177
Mo17	control	rep 3	42171012	SRS592178
Oh43	control	rep 1	20932486	SRS592194
B73	cold	rep 1	22542652	SRS592184
B73	cold	rep 2	40804694	SRS592185
B73	cold	rep 3	35587015	SRS592186
Mo17	cold	rep 1	29101074	SRS592173
Mo17	cold	rep 2	38045575	SRS592174
Mo17	cold	rep 3	51540517	SRS592175
Oh43	cold	rep 1	26931128	SRS592193
B73	heat	rep 1	17255150	SRS592181
B73	heat	rep 2	33557107	SRS592182
B73	heat	rep 3	40175033	SRS592183
Mo17	heat	rep 1	22732163	SRS592170
Mo17	heat	rep 2	35957158	SRS592171
Mo17	heat	rep 3	45290399	SRS592172
Oh43	heat	rep 1	23185524	SRS592192
B73	high salt	rep 1	24827202	SRS592190
Mo17	high salt	rep 1	24125308	SRS592179
Oh43	high salt	rep 1	26270046	SRS592195
B73	UV	rep 1	14156596	SRS592191
Mo17	UV	rep 1	19850314	SRS592180
Oh43	UV	rep 1	23386917	SRS592196
