# Supplementary material for: Transposable Elements Contribute to Activation of Maize Genes in Response to Abiotic Stress
Source: PLoS Genet. 2015 Jan 8;11(1):e1004915. doi: 10.1371/journal.pgen.1004915 (PMC4287451; doi:10.1371/journal.pgen.1004915)
Supplement: S10 Table — Validation of associations between TE polymorphisms and stress-induced gene activation in diverse inbred lines. (XLSX) [file pgen.1004915.s015.xlsx]

## Sheet: Table S10
Table S10. Validation of associations between TE polymorphisms and stress-induced gene activation in diverse inbred lines.
GRMZM2G071206								GRMZM2G400718								GRMZM2G102447								Gene 4: GRMZM2G108149								GRMZM2G108057
Line	Zm00346	Normalized Expression (to B control) Control	Normalized Expression (to B control) Cold	delta Ct Normalized	Normalized expression fold difference	Cold_Call	Correlation status	Line	Zm00346	Normalized Expression (to B control) Control	Normalized Expression (to B control) Cold	delta Ct Normalized	Normalized expression fold difference	Cold_Call	Correlation status	Line	Gyma	Normalized Expression (to O control) Control	Normalized Expression (to O control) Cold	delta Ct Normalized	Normalized expression fold difference	Cold_Call	Correlation status	Line	Zm00346	Normalized Expression (to O cold) Control	Normalized Expression (to O cold) Cold	delta Ct Normalized	Normalized expression fold difference	Cold_call	Correlation status	Line	Flip TE Insertion	Normalized Expression (to O control) Control	Normalized Expression (to O control) Cold	delta Ct Normalized	Normalized expression fold difference	UV_Call	Correlation status
B105	Present	0.126801	0.444265	1.80886	3.50365	Up	Yes	A619	Present	0.6898	1.39884	1.01998	2.02789	Up	Yes	A619	Present	0.958384	1.86867	0.963336	1.94981	Up	Yes	A619	Present	0.000615882	1.27672	11.0175	Up	Up	Yes	A619	Present	0.699117	1.81371	1.37534	2.59429	Up	Yes
C144	Present	0.0416	0.196064	2.23667	4.71309	Up	Yes	A634	Present	0.688488	1.19772	0.798786	1.73964	Up	Yes	H100	Present	2.96412	9.07876	1.61489	3.06289	Up	No	B97	Present	0.000858236	0.000724871	0	NE	NE	NE	A634	Present	0.664027	1.9067	1.52176	2.87141	Up	Yes
C49	Present	0.000349542	0.56429	10.6568	Up	Up	Yes	B97	Present	0.000475447	0.555799	10.1911	Up	Up	Yes	Ki11	Present	1.16704	3.60478	1.62705	3.08881	Up	Yes	C144	Present	0.0587694	0.330641	2.49213	5.62608	Up	Yes	B105	Present	0.547451	1.68561	1.62247	3.07902	Up	Yes
DE3	Present	0.000862755	0.000719509	0	NE	NE	NE	C144	Present	0.000308184	0.457959	10.5372	Up	Up	Yes	Ky21	Present	1.95774	1.75763	-0.155559	0.897785	ND	Yes	C49	Present	0.0609609	1.67954	4.78404	27.5511	Up	Yes	B97	Present	1.037	2.647	1.35195	2.55256	Up	Yes
I29	Present	0.0246847	0.662828	4.74695	26.8518	Up	Yes	Il101T	Present	0.000599051	0.000821645	0	NE	NE	NE	Oh43	Present	1	2.47366	1.30665	2.47366	Up	Yes	Co255	Present	0.00019085	0.51385	11.3947	Up	Up	Yes	C144	Present	0.568689	0.52307	-0.120637	0.919782	ND	No
Il101T	Present	0.339789	0.964788	1.50558	2.83938	Up	Yes	Mo17	Present	0.000257714	0.000183624	0	NE	NE	NE	Os420	Present	1.33837	2.3868	0.834596	1.78336	Up	Yes	I29	Present	0.0680046	1.5849	4.54262	23.3058	Up	Yes	C49	Present	0.661059	2.27431	1.78258	3.44041	Up	Yes
Ky21	Present	0.352619	0.890079	1.33582	2.52419	Up	Yes	Oh43	Present	0.000234546	0.401378	10.7409	Up	Up	Yes	PHG47	Present	0.524845	1.34353	1.35607	2.55987	Up	Yes	Il101T	Present	0.205616	1.0086	2.29432	4.90524	Up	Yes	Co255	Present	0.192528	0.164786	-0.224472	0.855908	ND	No
M14	Present	8.98077e-05	6.15299e-05	0	NE	NE	NE	Os420	Present	0.00635462	0.000198312	0	NE	NE	NE	R4	Present	1.07667	2.39543	1.15371	2.22485	Up	Yes	Ki11	Present	0.0012748	0.000919673	0	NE	NE	NE	DE3	Present	1.52863	1.41961	-0.106747	0.92868	ND	No
Mo17	Present	0.185869	0.558307	1.58677	3.00377	Up	Yes	PHG47	Present	0.000138705	0.382432	11.429	Up	Up	Yes	A634	Absent	2.24794	2.06112	-0.12518	0.91689	ND	Yes	Ky21	Present	0.000407317	0.502805	10.2696	Up	Up	Yes	Hp301	Present	4.70337	3.87856	-0.278173	0.824635	ND	No
Nc250	Present	0.986612	1.98698	1.01002	2.01394	Up	Yes	R4	Present	0.00377919	0.925342	7.93576	Up	Up	Yes	A680	Absent	1.67213	1.1918	-0.488545	0.712744	ND	Yes	M14	Present	1.07517	1.29566	0.269132	1.20508	ND	no	I29	Present	0.846623	2.04789	1.27435	2.4189	Up	Yes
Nc294	Present	0.911358	2.26792	1.31528	2.48851	Up	Yes	A680	Absent	1.23715	0.80914	-0.612561	0.654035	ND	Yes	B105	Absent	2.07096	1.895	-0.128107	0.915031	ND	Yes	Mo17	Present	0.000465202	1.21386	11.3495	Up	Up	Yes	Il101T	Present	0.996955	1.92023	0.945681	1.9261	Up	Yes
PHG47	Present	0.114325	0.147223	0.364865	1.28776	ND	No	B105	Absent	0.000267352	0.000203091	0	NE	NE	NE	B73	Absent	3.6386	5.43335	0.578456	1.49325	ND	Yes	Oh43	Present	0.000423381	1	11.2058	Up	Up	Yes	Ki11	Present	1.61114	4.38694	1.44513	2.72288	Up	Yes
Sg1533	Present	0.0225972	0.506585	4.48659	22.4181	Up	Yes	B73	Absent	1	0.698588	-0.517485	0.698588	ND	Yes	B97	Absent	3.62317	3.30294	-0.133506	0.911614	ND	Yes	PHG47	Present	0.000250378	0.000219614	0	NE	NE	NE	Ky21	Present	0.528378	1.85805	1.81414	3.51651	Up	Yes
A619	Absent	0.0338423	0.0211512	-0.678089	0.624993	ND	Yes	C49	Absent	0.526181	0.690511	0.392103	1.31231	ND	Yes	C144	Absent	1.69858	1.99818	0.234358	1.17638	ND	Yes	Sg1533	Present	0.000464666	0.00115677	0	NE	NE	NE	M14	Present	0.187121	0.458126	1.29178	2.44829	Up	Yes
A634	Absent	1.53141	1.12825	-0.440775	0.736739	ND	Yes	Co255	Absent	0.769533	0.715932	-0.104159	0.930347	ND	Yes	C49	Absent	2.06167	2.32944	0.176168	1.12988	ND	Yes	W182B	Present	0.00500901	0.000967577	0	NE	NE	NE	Nc250	Present	0.590089	1.45103	1.29807	2.459	Up	Yes
A680	Absent	0.000164963	0.000105961	0	NE	NE	Yes	DE3	Absent	0.000888969	0.00074137	0	NE	NE	NE	Co255	Absent	0.822436	0.73373	-0.164654	0.892143	ND	Yes	A634	Absent	1.53114	1.09848	-0.479093	0.717429	ND	Yes	Oh43	Present	1	2.36563	1.24223	2.36563	Up	Yes
B73	Absent	1	0.861712	-0.214722	0.861712	ND	Yes	H100	Absent	0.971958	1.49094	0.617253	1.53395	ND	Yes	DE3	Absent	9.43399	9.63576	0.0305299	1.02139	ND	Yes	A680	Absent	1.93469	2.13557	0.14252	1.10383	ND	Yes	Os420	Present	1.20822	2.50916	1.05432	2.07673	Up	Yes
B97	Absent	0.65067	0.705022	0.115743	1.08353	ND	Yes	Hp301	Absent	1.5961	1.77506	0.15332	1.11213	ND	Yes	Hp301	Absent	5.28101	4.83363	-0.127705	0.915286	ND	Yes	B105	Absent	1.4048	1.08206	-0.376585	0.770259	ND	Yes	PHG47	Present	0.315095	1.02559	1.7026	3.25486	Up	Yes
Co255	Absent	0.15654	0.170269	0.121281	1.0877	ND	Yes	I29	Absent	1.48804	0.990347	-0.58741	0.665537	ND	Yes	I29	Absent	4.32316	2.13921	-1.01501	0.494826	ND	Yes	B73	Absent	3.6812	4.16645	0.178642	1.13182	ND	Yes	R4	Present	1.41253	1.85598	0.393902	1.31394	ND	No
H100	Absent	1.10435	0.882001	-0.324352	0.798657	ND	Yes	IDS69	Absent	0.000335577	0.00029021	0	NE	NE	NE	IDS69	Absent	3.03422	1.99858	-0.602351	0.65868	ND	Yes	DE3	Absent	0.00160469	0.00133826	0	NE	NE	NE	Sg1533	Present	0.450213	1.47069	1.70781	3.26665	Up	Yes
Hp301	Absent	0.520022	0.425819	-0.288333	0.818848	ND	Yes	Ki11	Absent	0.000706218	0.000509483	0	NE	NE	NE	Il101T	Absent	5.68778	6.93772	0.286595	1.21976	ND	Yes	H100	Absent	0.00063906	0.00206863	0	NE	NE	NE	W182B	Present	1.61247	5.354	1.73135	3.32038	Up	Yes
IDS69	Absent	0.482575	0.511431	0.0837848	1.05979	ND	Yes	Ky21	Absent	1.45718	1.42594	-0.0312632	0.978563	ND	Yes	M14	Absent	0.797057	0.613569	-0.377456	0.769794	ND	Yes	Hp301	Absent	5.93574	7.5746	0.351741	1.2761	ND	Yes	A680	Absent	0.316202	0.196474	-0.686512	0.621354	ND	Yes
Ki11	Absent	0.958173	0.802934	-0.255004	0.837985	ND	Yes	M14	Absent	9.25363e-05	6.33994e-05	0	NE	NE	NE	Mo17	Absent	4.40059	3.93533	-0.161213	0.894273	ND	Yes	IDS69	Absent	1.8606	2.07459	0.157057	1.11501	ND	Yes	B73	Absent	3.445	3.15272	-0.127906	0.915159	ND	Yes
Mo46	Absent	0.343553	0.436654	0.345959	1.271	ND	Yes	Mo46	Absent	1.56773	1.74529	0.154792	1.11326	ND	Yes	Mo46	Absent	5.75633	6.80757	0.241991	1.18262	ND	Yes	Mo46	Absent	0.000546723	0.00140317	0	NE	NE	NE	H100	Absent	0.787852	1.09573	0.475897	1.39078	ND	Yes
Oh43	Absent	0.00022763	0.000157239	0	NE	NE	NE	Nc250	Absent	0.793813	0.574605	-0.466228	0.723855	ND	Yes	Nc250	Absent	1.35783	1.82147	0.423802	1.34146	ND	Yes	Nc250	Absent	0.00053382	0.000362143	0	NE	NE	NE	IDS69	Absent	0.535431	0.588515	0.136378	1.09914	ND	Yes
Os420	Absent	0.00616724	0.000192464	0	NE	NE	NE	Nc294	Absent	0.000273392	0.000201878	0	NE	NE	NE	Nc294	Absent	4.42698	4.989	0.17243	1.12696	ND	Yes	Nc294	Absent	0.000493503	0.000364412	0	NE	NE	NE	Mo17	Absent	1.69268	1.96386	0.214385	1.16021	ND	Yes
R4	Absent	0.00366775	0.000253974	0	NE	NE	NE	Sg1533	Absent	0.439283	0.414915	-0.0823349	0.944528	ND	Yes	Sg1533	Absent	2.29019	2.81933	0.299889	1.23105	ND	Yes	Os420	Absent	2.45204	2.09196	-0.22913	0.853149	ND	Yes	Mo46	Absent	0.505747	1.41172	1.48097	2.79136	Up	No
Va14	Absent	0.000336036	0.000238362	0	NE	NE	NE	Va14	Absent	0.000346246	0.000245604	0	NE	NE	NE	Va14	Absent	2.64316	2.3923	-0.143867	0.90509	ND	Yes	R4	Absent	0.00682187	0.000472381	0	NE	NE	NE	Nc294	Absent	0.541326	0.440585	-0.297076	0.8139	ND	Yes
W182B	Absent	0.00269308	0.000520215	0	NE	NE	NE	W182B	Absent	0.0027749	0.00053602	NE	NE	NE	NE	W182B	Absent	5.83348	4.33428	-0.428564	0.743001	ND	Yes	Va14	Absent	0.000625013	0.000443343	0	NE	NE	NE	Va14	Absent	0.675748	0.435143	-0.634995	0.643943	ND	Yes
